# Supplementary material for: Redox-active tubular frameworks with TTF: self-assemblies by complementary hydrogen-bonds and π-stacks of TTF-phenyluracil
Source: Royal Society of Chemistry journal article supplement (doi:10.1039/c1ce05794d), 2011-01-01
Supplement: c1ce05794d.pdf [file c1ce05794d.pdf]

## Supporting Information

### Redox-Active Tubular Frameworks with TTF: Self-Assemblies by Complementary Hydrogen-Bonds and $\pi$ -Stacks of TTF-Phenyluracil

Tsuyoshi Murata, Suguru Maki, Makoto Ohmoto, Eigo Miyazaki, Yoshikazu Umemoto, Kazuhiro

Nakasuji and Yasushi Morita

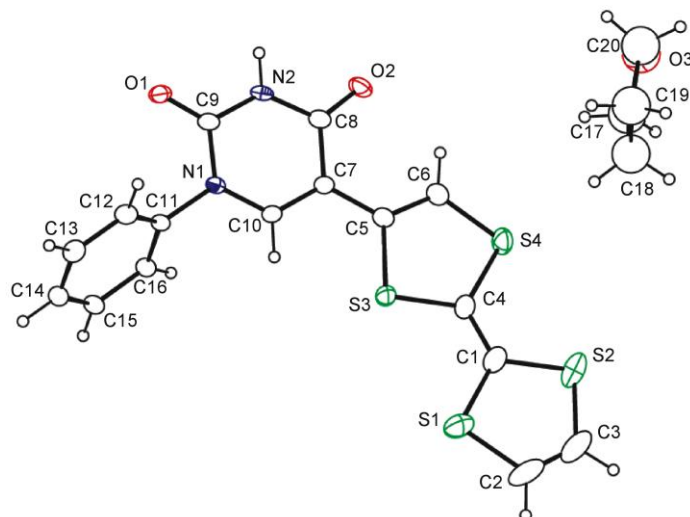

**Figure S1.** Ortep drawing of molecular structure (30% probability thermal ellipsoids) and atomic numberings of  $2 \cdot \text{THF}$ .

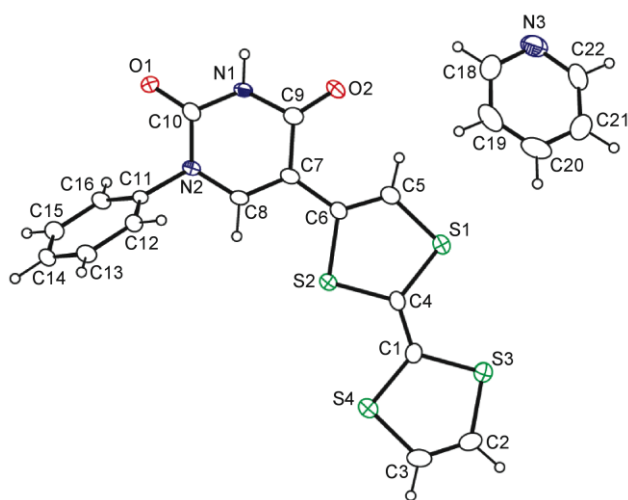

**Figure S2.** Ortep drawing of molecular structure (30% probability thermal ellipsoids) and atomic numberings of 2-pyridine.

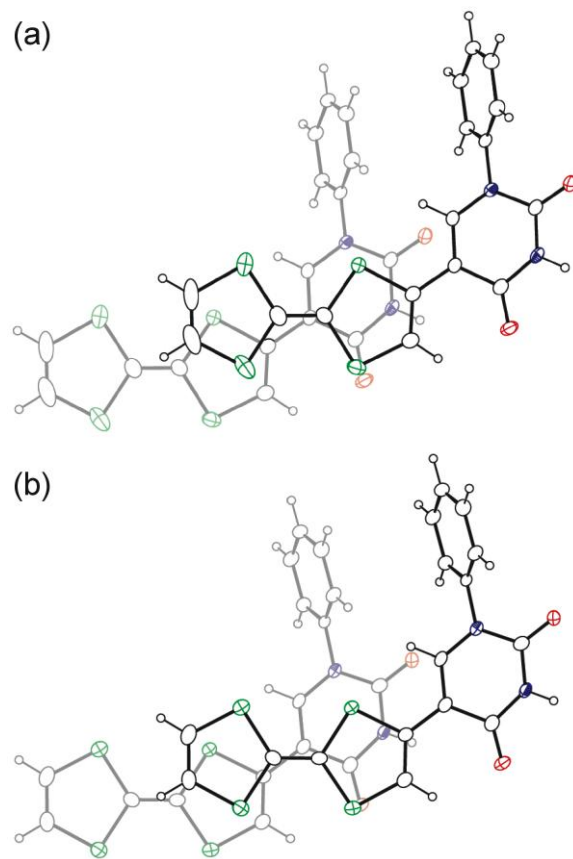

**Figure S3.** Overlap patterns in  $\pi$ -stacking columns of (a) **2•THF** and (b) **2•pyridine**. Ellipsoids are drawn at the 30% probability level.
